# Supplementary material for: Adalimumab induction and maintenance therapy achieve clinical remission and response in Chinese patients with Crohn's disease
Source: PubMed Central journal article supplement — Intest Res. 2016 Apr 27;14(2):152–63. doi: 10.5217/ir.2016.14.2.152 (PMC4863049; doi:10.5217/ir.2016.14.2.152), 2016-04-27
Supplement: ir-14-152-s001.pdf [file ir-14-152-s001.pdf]

**Supplementary Table 1.** Week 4 Remission Rates by Subgroups (Nonresponder Imputation Analysis)

| Variable             | ADA 80/40 mg (n=15) | ADA 160/80 mg (n=15) |
|----------------------|---------------------|----------------------|
| Corticosteroid use   |                     |                      |
| Yes                  | 1/3 (33)            | 3/5 (60)             |
| No                   | 5/12 (42)           | 7/10 (70)            |
| Immunomodulator use  |                     |                      |
| Yes                  | 5/10 (50)           | 8/11 (73)            |
| No                   | 1/5 (20)            | 2/4 (50)             |
| hs-CRP               |                     |                      |
| ≤median (31.25 mg/L) | 4/8 (50)            | 7/7 (100)            |
| >median (31.25 mg/L) | 2/7 (29)            | 3/8 (38)             |
| CDAI                 |                     |                      |
| ≤median (305)        | 4/8 (50)            | 4/7 (57)             |
| >median (305)        | 2/7 (29)            | 6/8 (75)             |
| Body weight          |                     |                      |
| ≤median (49.25 kg)   | 2/6 (33)            | 4/9 (44)             |
| >median (49.25 kg)   | 4/9 (44)            | 6/6 (100)            |

Values are presented as n/N (%)

ADA, adalimumab; hs, high-sensitivity.
